# Supplementary material for: TRIB3 mediates vascular calcification by facilitating self-ubiquitination and dissociation of Smurf1 in chronic kidney disease
Source: JCI journal article supplement (doi:10.1172/jci175972), 2025-02-11
Supplement: sd1 [file 1]

301 Moved Permanently

# Moved Permanently

The document has moved here.
