# Supplementary material for: TRIB3 mediates vascular calcification by facilitating self-ubiquitination and dissociation of Smurf1 in chronic kidney disease
Source: JCI journal article supplement (doi:10.1172/jci175972), 2025-02-11
Supplement: sd1 [file 1]

## SUPPLEMENTARY MATERIALS

### **TRIB3 induces vascular calcification through facilitating self ubiquitination and dissociation of Smurf1 in chronic renal disease**

Yihui Li<sup>1,2</sup>, Chang Ma<sup>1</sup>, Yanan Sheng<sup>1</sup>, Shanying Huang<sup>1</sup>, Huaibing Sun<sup>3</sup>, Yun Ti<sup>1</sup>, Zhihao Wang<sup>4</sup>, Feng Wang<sup>5</sup>, Fangfang Chen<sup>6</sup>, Chen Li<sup>2</sup>, Haipeng Guo<sup>2</sup>, Mengxiong Tang<sup>7</sup>, Fangqiang Song<sup>8</sup>, Hao Wang<sup>2</sup>, Ming Zhong<sup>1</sup>

<sup>1</sup>State Key Laboratory for Innovation and Transformation of Luobing Theory; Key Laboratory of Cardiovascular Remodeling and Function Research of MOE, NHC, CAMS and Shandong Province; Department of Cardiology, Qilu Hospital of Shandong University, Jinan, China.

<sup>2</sup>Department of Critical Care Medicine, Qilu Hospital; Innovation Research Center for Sepsis and Multiple Organ Injury, Shandong University, Jinan, China.

<sup>3</sup>Department of Organ Transplantation, Qilu Hospital, Shandong University, Jinan, China.

<sup>4</sup>Department of Geriatric Medicine, Qilu Hospital, Shandong University, Jinan, China.

<sup>5</sup>Department of Critical Care Medicine, Shandong Provincial Hospital, Jinan, Shandong, China

<sup>6</sup>Department of Cardiology, Shandong Provincial Qianfoshan Hospital, Jinan, Shandong, China

<sup>7</sup>Department of Emergency, Qilu Hospital, Shandong University, Jinan, China.

<sup>8</sup>Department of Critical Care Medicine, the Affiliated Tengzhou Hospital of Xuzhou Medical University/ Tengzhou Central People's Hospital, Shandong

**Authorship note:** YL and CM contributed equally to this work and are co-first authors.

Address correspondence to: Ming Zhong, State Key Laboratory for Innovation and Transformation of Luobing Theory; Key Laboratory of Cardiovascular Remodeling and Function Research of MOE, NHC, CAMS and Shandong Province; Department of Cardiology, Qilu Hospital of Shandong University,

Jinan, China. Phone:86.531.82165801; E-mail: zhongming2sdu@163.com. Or Hao Wang, Department of Critical Care Medicine, Qilu Hospital; Innovation Research Center for Sepsis and Multiple Organ Injury, Shandong University, Jinan, China. Phone:86.531.82165060; E-mail: wanghao34@126.com.

**Conflict of interest:** The authors have declared that no conflict of interest exists.

## TABLES

**Supplementary Table 1 Sera Donor characteristics of CKD patients and controls used in the present study**

| No.  | Age<br>(y) | Gender | Cr<br>( $\mu$ M) | Urea<br>(mM) | TG<br>(mM) | TC<br>(mM) | TP<br>(g/L) | ALB<br>(g/L) | Glu<br>(mM) | UA<br>( $\mu$ M) | Tbil<br>( $\mu$ M) | Dbil<br>( $\mu$ M) | Ca<br>(mM) | P<br>(mM) |
|------|------------|--------|------------------|--------------|------------|------------|-------------|--------------|-------------|------------------|--------------------|--------------------|------------|-----------|
| CTR1 | 35         | M      | 56               | 3.21         | 1.65       | 4.27       | 77.8        | 45.2         | 9.92        | 180.4            | 13.4               | 5.1                | 2.42       | 1.25      |
| CTR2 | 62         | F      | 72               | 6.24         | 2.05       | 5.72       | 70.6        | 47.4         | 4.42        | 251.7            | 11.2               | 6.9                | 2.15       | 1.42      |
| CTR3 | 42         | F      | 42               | 3.15         | 1.84       | 5.41       | 65.6        | 43.9         | 5.08        | 293.4            | 12.8               | 6.4                | 2.13       | 0.95      |
| CKD1 | 24         | M      | 324              | 16.7         | 5.03       | 1.78       | 72.1        | 40           | 5.89        | 514.2            | 13.5               | 5.0                | 1.85       | 2.51      |
| CKD2 | 72         | M      | 519              | 14.5         | 2.82       | 0.92       | 67.8        | 42.4         | 4.66        | 351.4            | 6.9                | 4.5                | 2.02       | 1.57      |
| CKD3 | 35         | M      | 521              | 20.4         | 2.68       | 0.68       | 70.1        | 40.3         | 4.92        | 457.9            | 6.6                | 3.5                | 2.09       | 1.66      |
| CKD4 | 55         | M      | 224              | 8.9          | 6.49       | 1.83       | 65.5        | 34.7         | 4.6         | 551.2            | 12.3               | 6.3                | 2.17       | 1.45      |
| CKD5 | 46         | M      | 632              | 18.7         | 4.55       | 2.41       | 63.7        | 47.8         | 13.64       | 354.7            | 9.2                | 4.8                | 1.74       | 1.82      |
| CKD6 | 65         | F      | 849              | 27.8         | 5.5        | 1.25       | 62.4        | 33.2         | 5.41        | 478.2            | 9.3                | 6.9                | 1.75       | 2.64      |
| CKD7 | 29         | F      | 1571             | 32.4         | 2.98       | 1.8        | 47.9        | 21.6         | 4.81        | 591.7            | 9.0                | 5.1                | 1.85       | 1.64      |
| CKD8 | 37         | F      | 421              | 15.4         | 3.06       | 1.48       | 55.6        | 37.4         | 9.92        | 245.5            | 9.7                | 5.7                | 1.75       | 2.29      |
| CKD9 | 42         | F      | 357              | 10.2         | 8.82       | 1.32       | 69.2        | 45.6         | 4.42        | 249.2            | 13.4               | 6.0                | 2.25       | 1.23      |

CR, Creatinine. TG, Triglycerides. TC, Total Cholesterol. TP, Total Protein. ALB, Albumin. Glu, glucose. UA, uric acid. Tbil, Total Bilirubin. Dbil, Direct Bilirubin. Ca, Calcium. P, Phosphorus.

**Supplementary Table 2 The characteristics of controls and chronic kidney disease patients with carotid endarterectomy used in the present study**

| Clinical characteristics           | CTR<br>(n=10)      | CKD<br>(n = 17)    | <i>P</i> |
|------------------------------------|--------------------|--------------------|----------|
| Age, y                             | 64.50(59.25,70.00) | 67(59.50,72.00)    | 0.727    |
| Female                             | 2(20.00)           | 6(35.29)           | 0.666    |
| Body mass index, kg/m <sup>2</sup> | 27.83(25.26,29.40) | 29.55(27.69,31.66) | 0.110    |
| Current drinking                   | 6(60)              | 10(58.82)          | 1.000    |
| Current smoking                    | 3(30)              | 10(58.82)          | 0.236    |
| CKD staging                        |                    |                    | <0.001   |
|                                    | 1                  | 0                  | 6        |
|                                    | 2                  | 0                  | 6        |
|                                    | 3                  | 0                  | 4        |
|                                    | 4                  | 0                  | 1        |
|                                    | 5                  | 0                  | 0        |
| Comorbidities                      |                    |                    |          |
| CAD                                | 6(60)              | 10(58.82)          | 0.018    |
| Hypertension                       | 6(60)              | 9(52.94)           | 1.000    |
| Diabetes                           | 7(70)              | 9(52.94)           | 0.448    |
| Primary parathyroid diseases       | 0(0)               | 0(0)               |          |
| Laboratory examination             |                    |                    |          |
| Total Calcium in Serum, mM         | 2.37 (2.26, 2.52)  | 2.30 (2.16, 2.51)  | 0.434    |
| Serum phosphorus, mM               | 1.25 (1.03, 1.39)  | 1.45 (1.20, 1.75)  | 0.059    |

CKD, chronic kidney disease. CAD, coronary artery disease. Continuous variables are displayed as median (interquartile range) and other values as n (%). CKD staging based on glomerular filtration rate (Kidney Disease: Improving Global Outcomes, KDIGO guidelines). Unpaired 2-tailed Student t test or Welch correction was used for continuous variables with normal distribution. Comparison of the prevalence of gender and comorbid conditions were made using the  $\chi^2$  test or Fisher exact tests if necessary.

**Supplementary Table 3 The characteristics of controls and chronic kidney disease patients who provided renal artery samples for the present study.**

| Clinical characteristics           | CTR<br>(n =16)       | CKD<br>(n = 16)      | <i>P</i> |
|------------------------------------|----------------------|----------------------|----------|
| Age, y                             | 39.00 (31.50, 44.75) | 42.50 (32.00, 52.75) | 0.122    |
| Female                             | 1(6.25)              | 3(18.75)             | 0.600    |
| Body mass index, kg/m <sup>2</sup> | 28.32 (25.93, 32.47) | 27.62 (27.27, 30.68) | 0.879    |
| Current drinking                   | 11(68.75)            | 5(31.25)             | 0.034    |
| Current smoking                    | 10(62.5)             | 10(62.5)             | 1.000    |
| CKD staging                        |                      |                      | <0.001   |
| 1                                  | 0                    | 0                    |          |
| 2                                  | 0                    | 0                    |          |
| 3                                  | 0                    | 0                    |          |
| 4                                  | 0                    | 0                    |          |
| 5                                  | 0                    | 16                   |          |
| Comorbidities                      |                      |                      |          |
| CAD                                | 3(18.75)             | 12(75.00)            | 0.001    |
| Hypertension                       | 4(25)                | 9(56.25)             | 0.072    |
| Diabetes                           | 4(25)                | 6(37.5)              | 0.446    |
| Primary parathyroid diseases       | 0(0)                 | 0(0)                 |          |
| Laboratory examination             |                      |                      |          |
| Total Calcium in Serum, mM         | 2.41 (2.21, 2.54)    | 2.17 (1.91, 2.30)    | 0.002    |
| Serum phosphorus, mM               | 1.13 (1.05, 1.23)    | 1.51 (1.10, 1.87)    | 0.003    |

CKD, chronic kidney disease. CAD, coronary artery disease. Continuous variables are displayed as median (interquartile range) and other values as n (%). CKD staging based on glomerular filtration rate (Kidney Disease: Improving Global Outcomes, KDIGO guidelines). Unpaired 2-tailed Student t test or Welch correction was used for continuous variables with normal distribution. Comparison of the prevalence of gender and comorbid conditions were made using the  $\chi^2$  test or Fisher exact tests if necessary.

**Supplementary Table 4 The characteristics of controls and chronic kidney disease patients who provided coronary artery samples for the present study.**

| Clinical characteristics           | CTR<br>(n =10)     | CKD<br>(n = 15)    | <i>P</i> |
|------------------------------------|--------------------|--------------------|----------|
| Age, y                             | 65.50(59.00,69.25) | 67(59.00,71.00)    | 0.836    |
| Female                             | 4(40)              | 5(33.33)           | 1.000    |
| Body mass index, kg/m <sup>2</sup> | 28.61(25.60,32.09) | 29.06(25.86,31.25) | 0.701    |
| Current drinking                   | 4(40)              | 6(40)              | 1.000    |
| Current smoking                    | 5(50)              | 9(60)              | 0.697    |
| CKD staging                        |                    |                    | <0.001   |
|                                    | 1                  | 0                  | 1        |
|                                    | 2                  | 0                  | 4        |
|                                    | 3                  | 0                  | 4        |
|                                    | 4                  | 0                  | 5        |
|                                    | 5                  | 0                  | 1        |
| Comorbidities                      |                    |                    |          |
| CAD                                | 3(30)              | 11(73.3)           | 0.049    |
| Hypertension                       | 3(30)              | 10(66.67)          | 0.111    |
| Diabetes                           | 3(30)              | 8(53.33)           | 0.414    |
| Primary parathyroid diseases       | 0(0)               | 0(0)               |          |
| Laboratory examination             |                    |                    |          |
| Total Calcium in Serum, mM         | 2.13(2.11,2.14)    | 2.07(2.00,2.13)    | 0.011    |
| Serum phosphorus, mM               | 1.16(0.91,1.39)    | 1.62(1.42,1.77)    | 0.004    |

CKD, chronic kidney disease. CAD, coronary artery disease. Continuous variables are displayed as median (interquartile range) and other values as n (%). CKD staging based on glomerular filtration rate (Kidney Disease: Improving Global Outcomes, KDIGO guidelines). Unpaired 2-tailed Student t test or Welch correction was used for continuous variables with normal distribution. Comparison of the prevalence of gender and comorbid conditions were made using the  $\chi^2$  test or Fisher exact tests if necessary.

**Supplementary Table 5 Animals Physiological parameters and renal function in the final**

| Parameters           | Sham            |                 | CKD             |                  |
|----------------------|-----------------|-----------------|-----------------|------------------|
|                      | WT              | <i>TRIB3</i>    | WT              | <i>TRIB3</i>     |
| BW (g)               | 30.18 ± 3.78    | 31.09 ± 2.25    | 22.86 ± 4.83**  | 22.7 ± 4.78**    |
| SBP (mmHg)           | 123.64 ± 23.2   | 116.25 ± 26.26  | 147.8 ± 34.4    | 140.36 ± 37.73   |
| DBP (mmHg)           | 78.23 ± 15.12   | 77.54 ± 14.45   | 93.51 ± 23.52   | 92.42 ± 19.8     |
| Heart rate (bpm)     | 582.97 ± 133.56 | 519.93 ± 136.98 | 585.72 ± 118.91 | 585.35 ± 119.5   |
| BUN (mM)             | 7.64 ± 2.03     | 7.1 ± 1.52      | 17.18 ± 3.07*** | 16.9 ± 4.14***   |
| Cr (μM)              | 13.66 ± 3.47    | 14.07 ± 3.25    | 60.2 ± 11.83*** | 58.55 ± 13.93*** |
| Serum Calcium (mM)   | 0.151 ± 0.019   | 0.143 ± 0.013   | 0.125 ± 0.019** | 0.122 ± 0.01**   |
| Serum Phosphate (mM) | 2.07 ± 0.17     | 2.26 ± 0.29     | 3.61 ± 0.47***  | 3.39 ± 0.58***   |

Arithmetic means ± SEM. \*\*  $p < 0.01$ , \*\*\*  $p < 0.001$  statistically significant vs. Sham WT mice.

BW, body weight; SBP, systolic blood pressure; DBP, diastolic blood pressure; Bpm, bit per minute; BUN, blood urea nitrogen; Cr, blood creatinine. n=10-12.

| Parameters           | Sham            |                      | DM CKD           |                      |
|----------------------|-----------------|----------------------|------------------|----------------------|
|                      | <i>ApoE</i> KO  | <i>ApoE/TRIB3</i> KO | <i>ApoE</i> KO   | <i>ApoE/TRIB3</i> KO |
| BW (g)               | 29.78 ± 3.93    | 27.79 ± 5.36         | 22.03 ± 6**      | 21.56 ± 6.2**        |
| SBP (mmHg)           | 112.41 ± 25.76  | 113.73 ± 25.29       | 141.39 ± 35.23   | 133.04 ± 16.32       |
| DBP (mmHg)           | 72.36 ± 17.1    | 73.57 ± 15.31        | 91.76 ± 26.53    | 86.33 ± 9.73         |
| Heart rate (bpm)     | 501.47 ± 119.87 | 579.68 ± 121.67      | 561.08 ± 148.34  | 620.69 ± 127.11      |
| BUN (mM)             | 6.26 ± 2.02     | 6.6 ± 1.49           | 20.05 ± 3.58***  | 18.91 ± 3.17***      |
| Cr (μM)              | 15.44 ± 2.26    | 13.35 ± 3.65         | 64.17 ± 14.3***  | 59.39 ± 13.89***     |
| Serum Calcium (mM)   | 0.156 ± 0.021   | 0.142 ± 0.02         | 0.121 ± 0.011*** | 0.133 ± 0.015*       |
| Serum Phosphate (mM) | 2.27 ± 0.26     | 2.38 ± 0.25          | 4.13 ± 0.48***   | 3.65 ± 0.71***       |

Arithmetic means ± SEM. \*  $p < 0.05$ , \*\*  $p < 0.01$ , \*\*\*  $p < 0.001$  statistically significant vs. Sham WT mice.

BW, body weight; SBP, systolic blood pressure; DBP, diastolic blood pressure; Bpm, bit per minute; BUN, blood urea nitrogen; Cr, blood creatinine. n=10-12.

**Supplementary Table 6 Animals in the present study**

| Experimental                                              | Group                | Species | Gender | Source                                  | Background | Starting number | Final number | Excluded number from analysis and reasons                                                                     |
|-----------------------------------------------------------|----------------------|---------|--------|-----------------------------------------|------------|-----------------|--------------|---------------------------------------------------------------------------------------------------------------|
| CKD after AKI                                             | Sham WT              | Mouse   | Male   | Joslin Diabetes Center& Vital River Lab | C57BL/6J   | 25              | 25           | 0                                                                                                             |
|                                                           | Sham TRIB3 KO        |         |        |                                         |            | 25              | 25           | 0                                                                                                             |
|                                                           | CKD WT               |         |        |                                         |            | 25              | 21           | 4(Dead at final)                                                                                              |
|                                                           | CKD TRIB3 KO         |         |        |                                         |            | 25              | 18           | 1(Dead for operation),4(Dead at final),2(severe cachexia)                                                     |
| DM CKD (Hyperlipidemic diabetes mellitus in ApoE KO mice) | Sham ApoE KO         | Mouse   | Male   | Joslin Diabetes Center& Vital River Lab | C57BL/6J   | 25              | 23           | 2(Dead at final)                                                                                              |
|                                                           | Sham TRIB3 ApoE KO   |         |        | Joslin Diabetes Center& Vital River Lab |            | 25              | 22           | 3(Dead at final)                                                                                              |
|                                                           | DM CKD ApoE KO       |         |        | Joslin Diabetes Center& Vital River Lab |            | 25              | 20           | 2(Dead at final),3(severe cachexia)                                                                           |
|                                                           | DM CKD TRIB3/ApoE KO |         |        | Joslin Diabetes Center& Vital River Lab |            | 25              | 16           | 5(Dead at final),3(severe cachexia), 1 (Die for hemorrhoea when measure intravascular arteria blood pressure) |
| CKD after AKI                                             | Sham WT              | Mouse   | Female | Joslin Diabetes Center& Vital River Lab | C57BL/6J   | 15              | 15           | 0                                                                                                             |
|                                                           | Sham TRIB3 KO        |         |        |                                         |            | 15              | 14           | 1(Dead for operation)                                                                                         |
|                                                           | CKD WT               |         |        |                                         |            | 15              | 12           | 3(Dead at final)                                                                                              |
|                                                           | CKD TRIB3 KO         |         |        |                                         |            | 15              | 11           | 4(Dead at final)                                                                                              |
| CKD after AKI                                             | Sham CTR             | Mouse   | Male   | GemPharmatech                           | C57BL/6J   | 15              | 15           | 0                                                                                                             |



|                                                                           |                                            |       |      |                                                     |          |    |    |                                                               |
|---------------------------------------------------------------------------|--------------------------------------------|-------|------|-----------------------------------------------------|----------|----|----|---------------------------------------------------------------|
|                                                                           | Sham<br>SMC-<br>TRIB3 <sup>KO</sup>        |       |      |                                                     |          | 15 | 15 | 0                                                             |
|                                                                           | CKD<br>CTR                                 |       |      |                                                     |          | 15 | 10 | 5(Dead at final)                                              |
|                                                                           | CKD<br>Sham<br>SMC-<br>TRIB3 <sup>KO</sup> |       |      |                                                     |          | 15 | 12 | 3(Dead at final)                                              |
| CKD after<br>AKI                                                          | Sham<br>CTR                                | Mouse | Male | GemPhar<br>matech                                   | C57BL/6J | 15 | 15 | 0                                                             |
|                                                                           | Sham EC-<br>TRIB3 <sup>KO</sup>            |       |      |                                                     |          | 15 | 15 | 0                                                             |
|                                                                           | CKD<br>CTR                                 |       |      |                                                     |          | 15 | 11 | 3(Dead at final), 1(severe<br>cachexia)                       |
|                                                                           | CKD<br>Sham EC-<br>TRIB3 <sup>KO</sup>     |       |      |                                                     |          | 15 | 10 | 4(Dead at final)                                              |
| DM CKD<br>(Diabetes<br>mellitus in<br>C57BL/6J<br>background<br>mice)     | Sham WT                                    | Mouse | Male | Joslin<br>Diabetes<br>Center&<br>Vital<br>River Lab | C57BL/6J | 20 | 18 | 2(Dead at final)                                              |
|                                                                           | Sham<br>TRIB3<br>KO                        |       |      |                                                     |          | 20 | 20 | 0                                                             |
|                                                                           | CKD WT                                     |       |      |                                                     |          | 20 | 14 | 4(Dead at final), 2(severe<br>cachexia)                       |
|                                                                           | CKD<br>TRIB3<br>KO                         |       |      |                                                     |          | 20 | 17 | 3(Dead at final)                                              |
| Vitamin D <sub>3</sub> -<br>Induced<br>Vascular<br>Calcification<br>Model | Sol WT                                     | Mouse | Male | Joslin<br>Diabetes<br>Center&<br>Vital<br>River Lab | C57BL/6J | 20 | 17 | 3(Dead at final)                                              |
|                                                                           | Sol<br>TRIB3<br>KO                         |       |      |                                                     |          | 20 | 19 | 1(Dead at final)                                              |
|                                                                           | VitD WT                                    |       |      |                                                     |          | 20 | 12 | 3(Dead for suspected severe<br>peritonitis), 5(Dead at final) |
|                                                                           | VitD<br>TRIB3<br>KO                        |       |      |                                                     |          | 20 | 14 | 6(Dead at final)                                              |

**Supplementary Table 7 Primers used in the present study**

| Species | Gene       | Forward (5'→3')        | Reverse (5'→3')         | Product size (bp) | Purpose                    |
|---------|------------|------------------------|-------------------------|-------------------|----------------------------|
| Human   | TRIB3      | TGGTACCCAGCTCCTCTACG   | GACAAAGCGACACAGCTTGA    | 184               | qPCR                       |
| Human   | GAPDH      | GGAGCGAGATCCCTCCAAAAT  | GGCTGTTGTCATACTTCTCATGG | 197               | qPCR                       |
| Human   | Runx2      | TGGTTACTGTCATGGCGGGTA  | TCTCAGATCGTTGAACCTTGCTA | 101               | qPCR                       |
| Human   | Smad1      | AGAGACTTCTTGGGTGGAAACA | ATGGTGACACAGTTACTCGGT   | 157               | qPCR                       |
| Human   | Osterix    | GAGGCAACTGGCTAGGTGG    | CTGGATTAAGGGGAGCAAAGTC  | 132               | qPCR                       |
| Human   | Msx2       | ATGGCTTCTCCGTCCAAAGG   | CGGCTTCTTGTCGGACATGA    | 174               | qPCR                       |
| Human   | Klf6       | GGCAACAGACCTGCCTAGAG   | CTCCCGAGCCAGAATGATTTT   | 122               | qPCR                       |
| Human   | Twist1     | GTCCGCAGTCTTACGAGGAG   | GCTTGAGGGTCTGAATCTTGCT  | 156               | qPCR                       |
| Human   | ALPL       | ACTGGTACTCAGACAACGAGAT | ACGTCAATGTCCCTGATGTTATG | 97                | qPCR                       |
| Human   | COL1A1     | GAGGGCCAAGACGAAGACATC  | CAGATCACGTCATCGCACAAAC  | 140               | qPCR                       |
| Human   | BMP2       | TTCGGCCTGAAACAGAGACC   | CCTGAGTGCCTGCGATACAG    | 83                | qPCR                       |
| Human   | BGLAP      | CACTCCTCGCCCTATTGGC    | CCCTCCTGCTTGGACACAAAG   | 112               | qPCR                       |
| Mouse   | TRIB3 BS   | CTAGTGCCAGACCCAGC      | ACAGATGGTGCAATCCCGG     | 156               | ChIP-PCR<br>FAIRE-ChIP-PCR |
| Mouse   | TRIB3 5'BS | GCAGGTGGATCGTTGAGTTC   | GAAAGGGTTGCTTTGGAGGG    | 196               | FAIRE-ChIP-PCR             |
| Mouse   | TRIB3 3'BS | AGGAGCGAGAGAGTGAGAGT   | CTCCAGGACAAGGTACCCAG    | 245               | FAIRE-ChIP -PCR            |

**Supplementary Table 8 Antibodies used in the present study**

| Antibody target | Supplier    | Catalog No. | IP (immunoprecipitation) | Dilution (IHC) | Dilution (IF) | Dilution (WB) |
|-----------------|-------------|-------------|--------------------------|----------------|---------------|---------------|
| Runx2           | Abcam       | ab76956     |                          |                |               | 1:1000        |
| Runx2           | Abcam       | ab192256    |                          | 1:500          |               |               |
| Smad1           | Santa Cruz  | sc-7965     |                          | 1:500          |               | 1:2000        |
| $\alpha$ SMA    | Abcam       | ab66133     |                          |                | 1:400         |               |
| CHOP            | Proteintech | 66741-1-ig  |                          |                |               | 1:2000        |
| Ubiquitin       | Abcam       | ab134953    |                          |                |               | 1:5000        |
| PDI             | Proteintech | 66422-i-ig  |                          |                |               | 1:10000       |
| TRIB3           | Santa Cruz  | sc34215     |                          | 1:1000         | 1:500         | 1:1000        |
| ATF4            | Santa Cruz  | sc-390063   |                          |                |               | 1:1000        |
| Smurf1          | Santa Cruz  | sc-100616   |                          |                |               | 1:1000        |
| Smurf2          | Santa Cruz  | sc393848    |                          |                |               | 1:1000        |
| Rabbit IgG      | CST         | 5127        |                          |                |               | 1:5000        |
| Myc             | CST         | 2278        | 1:50                     |                |               | 1:1000        |
| Flag            | Millipore   | 14793       | 1:50                     |                |               | 1:1000        |
| HA              | CST         | 3724        |                          |                |               | 1:1000        |
| GAPDH           | Proteintech | 60004-1-Ig  |                          |                |               | 1:50000       |
| K48             | CST         | 8081        |                          |                |               | 1:1000        |
| K63             | CST         | 5621        |                          |                |               | 1:1000        |
| GRP78           | Proteintech | 66574-1-Ig  |                          |                |               | 1:20000       |
| p-PERK          | Proteintech | 82534-1-RR  |                          |                |               | 1:5000        |
| PERK            | Proteintech | 68482-1-Ig  |                          |                |               | 1:10000       |
| OPN             | Santa Cruz  | sc-21742    |                          | 1:50           |               |               |
| Lamin B1        | Proteintech | 66095-1-Ig  |                          |                |               | 1:20000       |
| Nephrin         | Abcam       | ab227806    |                          |                | 1:2000        |               |

**Figure and figure legends**

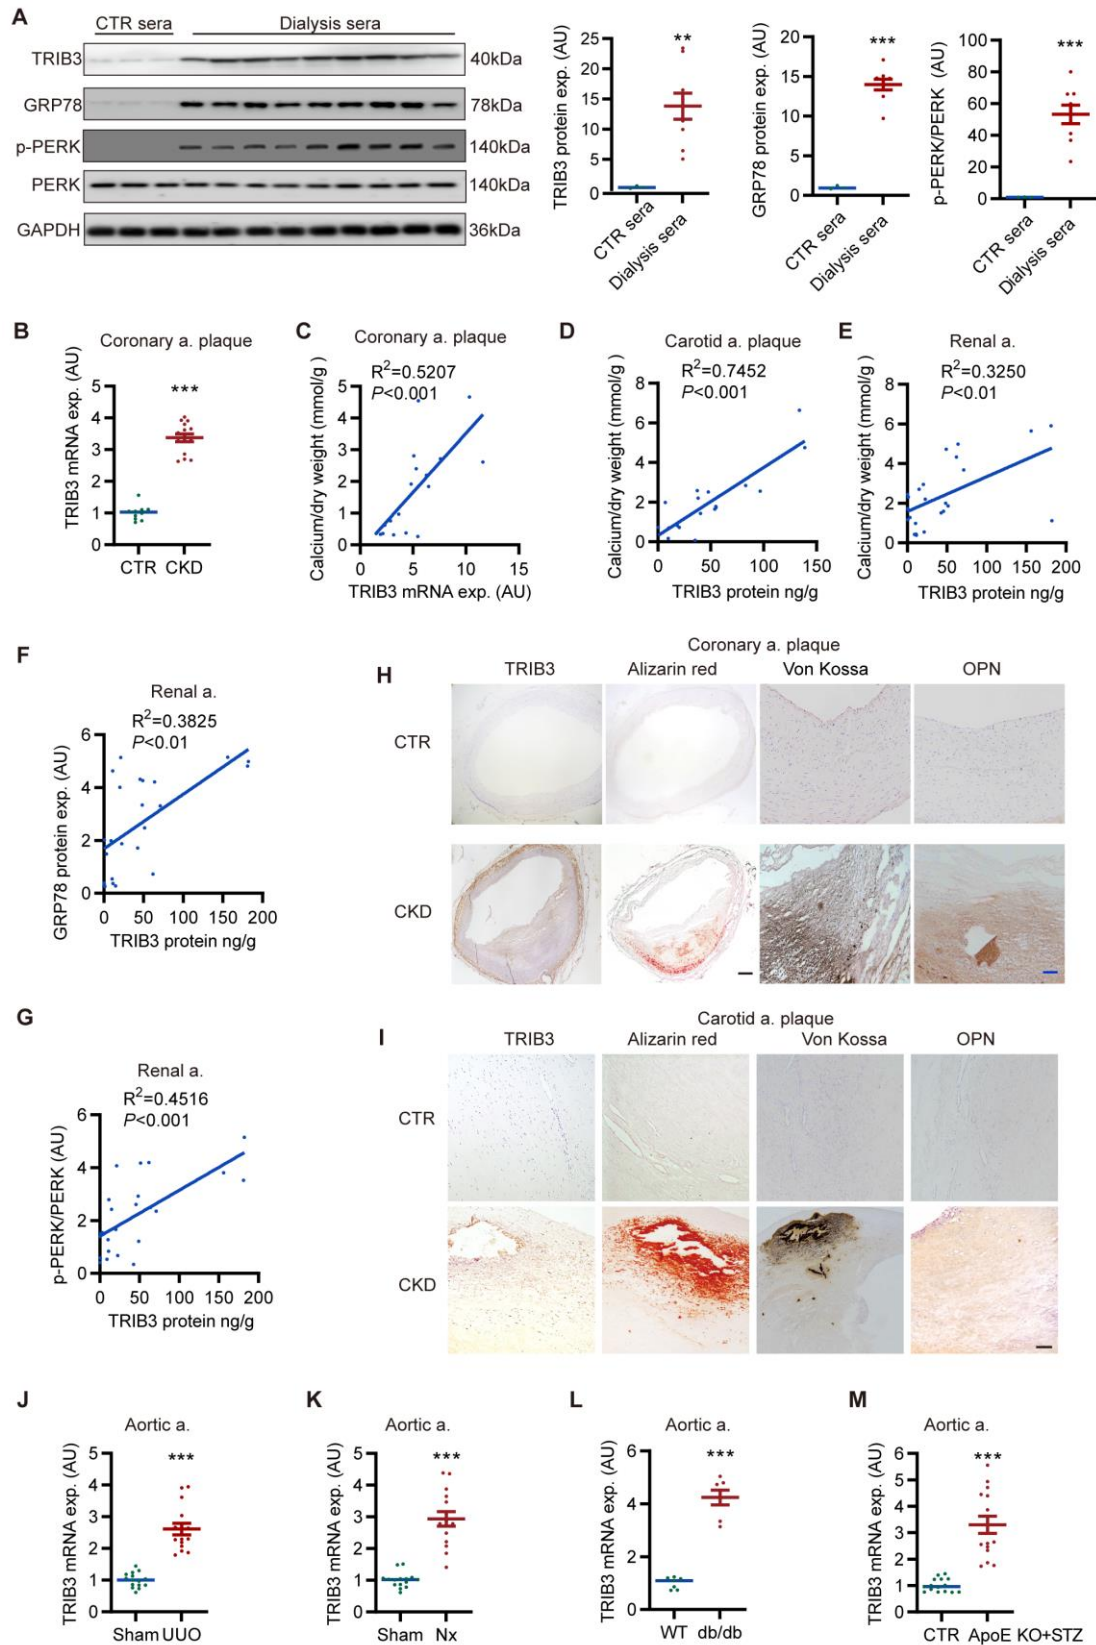

**Supplementary Figure 1. Elevated ER stress, TRIB3 expression in CKD environment of hVSMC and coronary artery plaque.**

**A,** Western blots analysis of TRIB3, GPR78 and phosphorylation of PERK expression in hVSMCs following treatment CTR or dialysis patients' sera for 3 days. n=3-9 per group. Statistical analyses were performed using the unpaired 2-tailed Student *t* test with Welch correction. Relative values are compared against those of CTR sera group. **B,** RT-qPCR analysis of TRIB3 relative mRNA expression in CKD patient's coronary artery plaque, n=18 per group. Statistical analyses were performed using the unpaired 2-tailed Student *t* test. Relative values are compared against those of CTR group. **C,** Correlation of TRIB3 relative mRNA expression and calcium deposition in coronary artery plaque from CTR and CKD patients, *P* represents the 2-tailed probability value of the Pearson correlation, n=10-15 per group. **D-E,** Correlation of TRIB3 relative protein expression and calcium deposition in carotid artery plaque and renal artery from CTR and CKD patients, *P* represents the 2-tailed probability value of the Pearson correlation, n=18. **F-G,** Correlation of TRIB3 and GPR78 (D), or TRIB3 and phosphorylation of PERK (E) relative protein expression in renal artery from CTR and CKD patients, *P* represents the 2-tailed probability value of the Pearson correlation, n=24 per group. **H,** Representative original histological images and IHC analysis showing TRIB3 expression and ectopic calcification in coronary artery plaque from control CTR and CKD patients. Alizarin Red staining identifies mid-to-late-stage mineralization, Von Kossa staining identifies late-stage calcification, osteopontin (OPN) serves as a marker for osteogenic differentiation. Black scale bars: 200  $\mu$ m, blue scale bars: 100  $\mu$ m. **I,** Representative original histological images and immunohistochemistry (IHC) analysis showing TRIB3 expression and ectopic calcification in carotid plaque from control CTR and CKD patients. Alizarin Red staining identifies mid-to-late-stage mineralization, Von Kossa staining identifies late-stage calcification, osteopontin (OPN) serves as a marker for osteogenic differentiation. Scale bar=100  $\mu$ m. **J-M,** RT-qPCR analysis of TRIB3 mRNA expression relative to controls in the aortic artery of the

indicated group of mice. Statistical analyses were performed using the unpaired 2-tailed Student *t* test with Welch correction. Relative values are compared against those of Sham, WT or CTR group. Scatter dot plots and arithmetic means  $\pm$  SEM (arbitrary units (AU)). \*\**P* < 0.01, \*\*\**P* < 0.001 statistically significant vs. Sham, WT, CTR, or CTR sera.

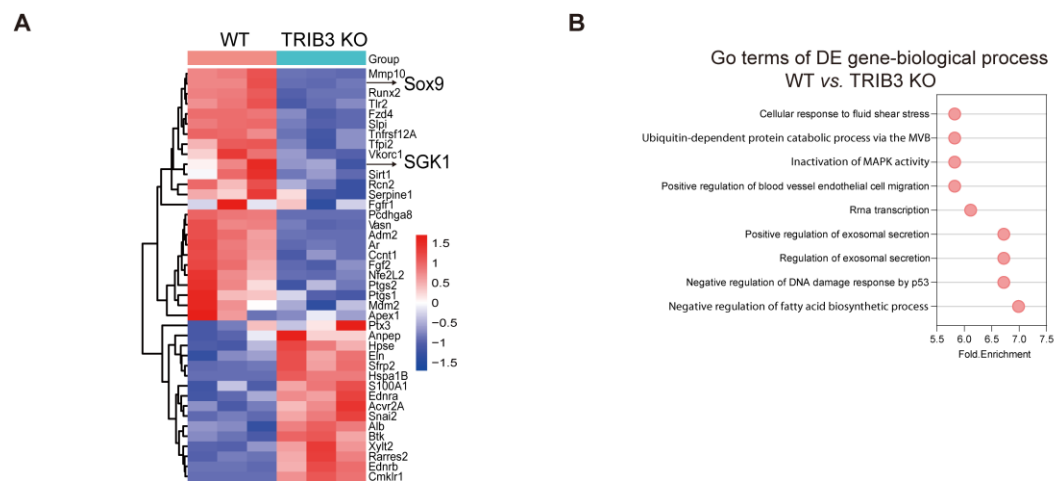

## Supplementary Figure 2.

**A**, Heatmap of DEGs of vascular calcification phenotype gene cluster (DisGenNet C0342649) in mVSMC of WT and TRIB3 knockout mice. **B**, GO analysis of DEGs in mVSMC from WT and TRIB3 knockout mice.

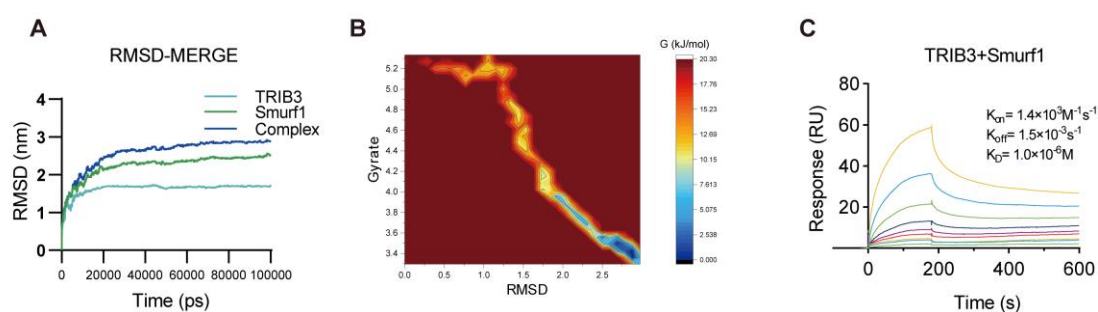

**Supplementary Figure 3. Molecular dynamics simulation of human Smurf1 and TRIB3 interaction.**

**A**, Root Mean Square Deviation of human Smurf1, TRIB3 and protein-protein interact complex by Gromacs. **B**, Free Energy Landscape of Smurf1 and TRIB3 complex. Human Smurf1 (Q9HCE7) and TRIB3 (Q96RU7) structure was predicted with AlphaFold 2. **C**, Membrane-binding analysis via surface plasmon resonance (SPR) spectroscopy. SPR sensorgrams having association time intervals of 200 s and dissociation time intervals of 800. RU values were computed relative to the RUL values at each concentration. The presented results represent one of three independent replicates.



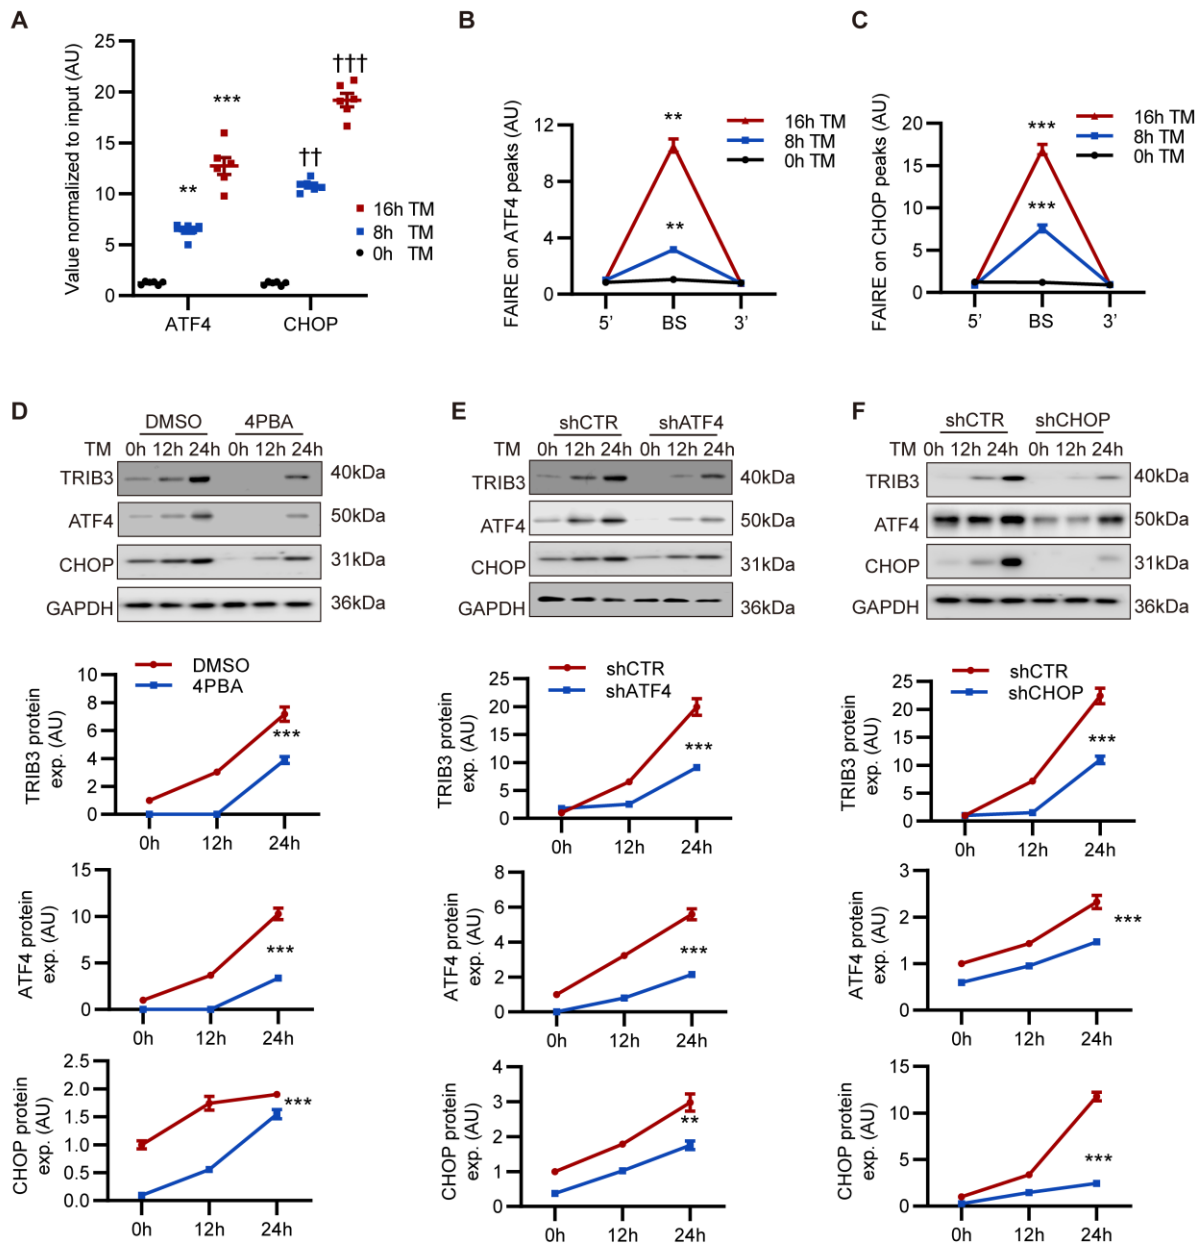

**Supplementary Figure 4. ATF4 and CHOP induced TRIB3 transcription in tunicamycin stimuli**

**A**, ChIP-PCR showing enrichment of both ATF4 and CHOP at the TRIB3 binding site (BS) in mVSMC treated 0.1  $\mu$ g/ml tunicamycin (TM) for 24h. Statistical analyses were performed using the 1-way ANOVA. \*\* $P < 0.01$ , \*\*\* $P < 0.001$  statistically significant vs. 0h TM treatment (ATF4), †† $P < 0.01$ , ††† $P < 0.001$  statistically significant vs. 0h TM treatment (CHOP). **B-C**, FAIRE-ChIP PCR was performed on TM for indicated time in mVSMC. Statistical analyses were performed using the repeated measures two-way ANOVA. **D-F**, Representative western blots of TRIB3, ATF4, and CHOP in mVSMC stimulated with treated with TM at the indicated times after pretreated with 5  $\mu$ M 4-Phenylbutyric acid (4PBA) for 12h, or transfected with shRNA for knockdown ATF4 and CHOP for

48h. Statistical analyses were performed using the repeated measures two-way ANOVA.  $*P < 0.05$ ,  $**P < 0.01$ ,  $***P < 0.001$  statistically significant vs. 0h treatment, DMSO, or shCTR. Each experiment was repeated independently for six times. Scatter dot plots and arithmetic means  $\pm$  SEM (AU).

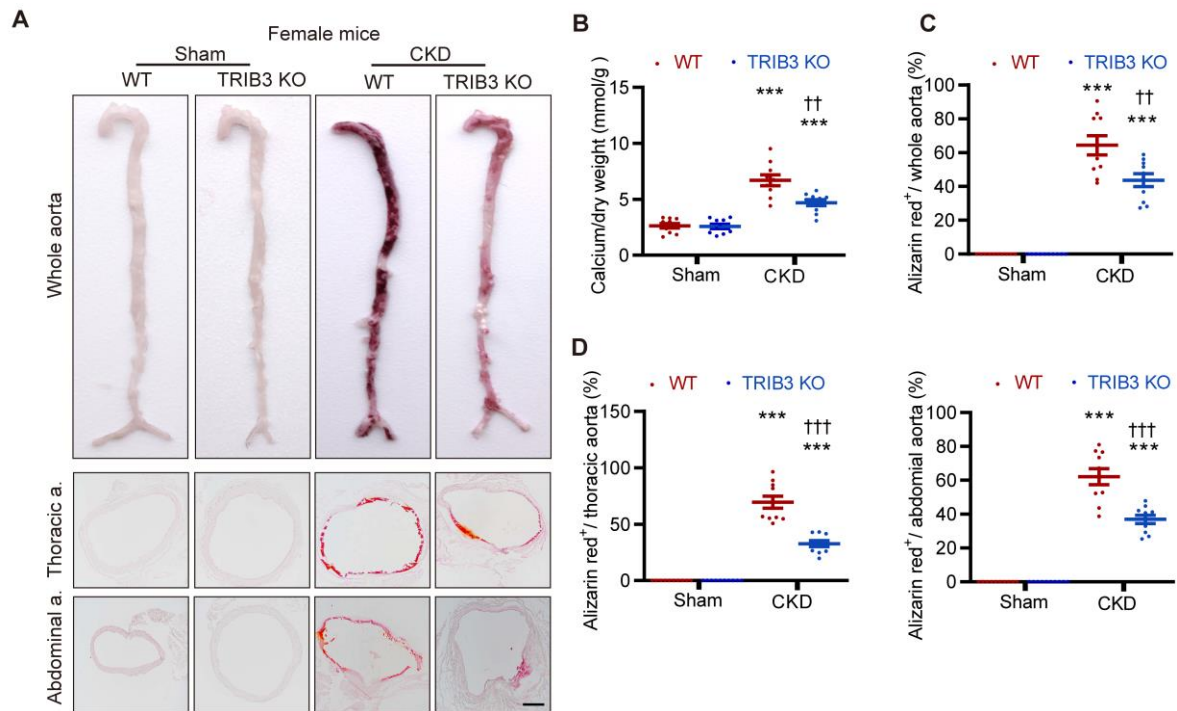

**Supplementary Figure 5. Effect of TRIB3 deficiency during AKI-induced CKD vascular calcification in female mice.**

**A**, Representative Alizarin red staining of whole aorta and thoracic and abdominal aorta section images showing aortic alizarin red staining in AKI-induced CKD female mice. Scale bar: 50μm. Calcified areas are shown as red staining. **B**, Calcium content analysis in the aortic arch of AKI-induced CKD female mice, normalized by dry weight. Statistical analyses were performed using the 2-way ANOVA. **C-D**, The ratio of Alizarin Red-positive area to the whole aortic area, thoracic aorta, and abdominal aorta in the indicated group of mice. Statistical analyses were performed using the 2-way ANOVA. Statistical analyses were performed using the 2-way ANOVA. \*\*\* $P < 0.001$  statistically significant vs. Sham WT mice; †† $P < 0.01$ , ††† $P < 0.001$  statistically significant vs. CKD WT mice.  $n = 10$  per group. Scatter dot plots and arithmetic means  $\pm$  SEM (AU).

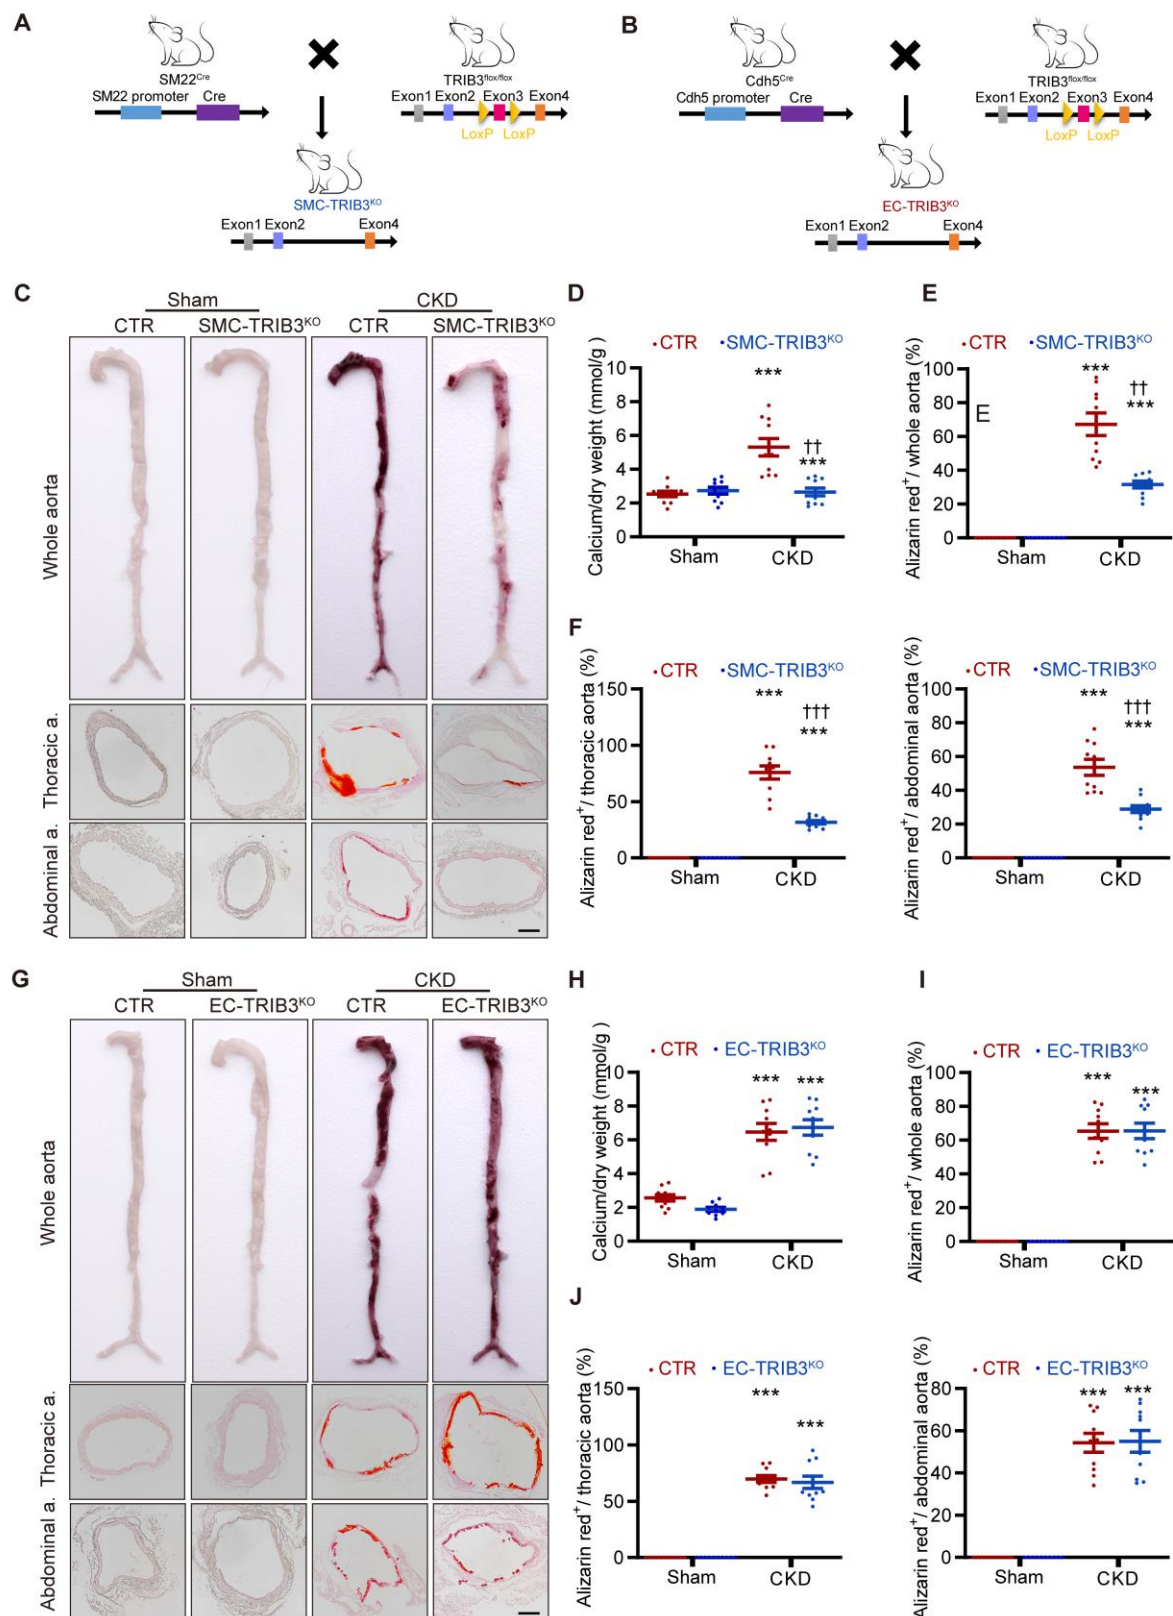

**Supplementary Figure 6. Impact of TRIB3 deficiency in vascular smooth muscle cell- or endothelial cell-specific knockout mice**

**A**, Schematic diagram of transgenic mice used to generate adult smooth muscle cell-specific TRIB3

knockout mice. **B**, Schematic diagram of transgenic mice used to generate adult vascular endothelial cell -specific TRIB3 knockout mice. **C**, Representative Alizarin red staining of whole aorta and thoracic and abdominal aorta section images showing aortic alizarin red staining in the indicated group of mice. Scale bar: 50 $\mu$ m. Calcified areas are shown as red staining. **D**, Calcium content analysis in the aortic arch of indicated group of mice, normalized by dry weight. Statistical analyses were performed using the 2-way ANOVA. **E-F**, The ratio of Alizarin Red-positive area to the whole aortic area, thoracic aorta, and abdominal aorta in the indicated group of mice. Statistical analyses were performed using the 2-way ANOVA. **G**, Representative Alizarin red staining of whole aorta and thoracic and abdominal aorta section images showing aortic alizarin red staining in the indicated group of mice. Scale bar: 50 $\mu$ m. Calcified areas are shown as red staining. **H**, Calcium content analysis in the aortic arch of indicated group of mice, normalized by dry weight. Statistical analyses were performed using the 2-way ANOVA. **I-J**, The ratio of Alizarin Red-positive area to the whole aortic area, thoracic aorta, and abdominal aorta in the indicated group of mice. Statistical analyses were performed using the 2-way ANOVA. \*\*\* $P < 0.001$  statistically significant vs. Sham CTR mice; †† $P < 0.01$ , ††† $P < 0.001$  statistically significant vs. CKD CTR mice. n =10 per group unless otherwise indicated. Scatter dot plots and arithmetic means  $\pm$  SEM (AU).

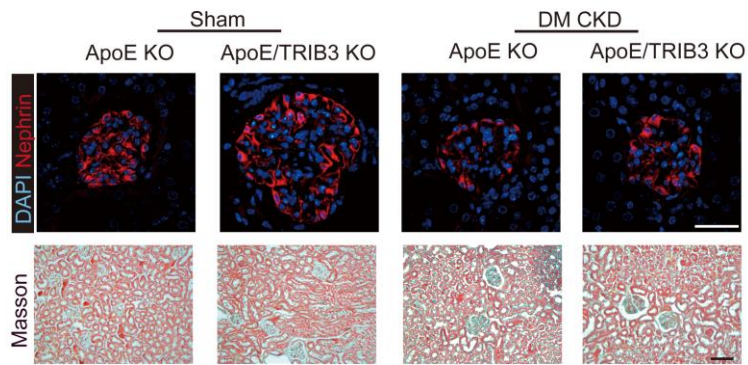

**Supplementary Figure 7. The renal injury of metabolic CKD in diabetic ApoE knockout mice.**

Upper lane, Representative immunofluorescence of Nephlin in kidney tissue in diabetic ApoE knockout mice. The 4',6-diamidino-2-phenylindole (DAPI) indicated the nuclei as blue, Nephlin indicated as red. Scale bars: 20  $\mu$ m. Lower lane, Representative Masson's trichrome stain for kidney tissue in diabetic *ApoE* knockout mice. The above results are representative figures from six mice.

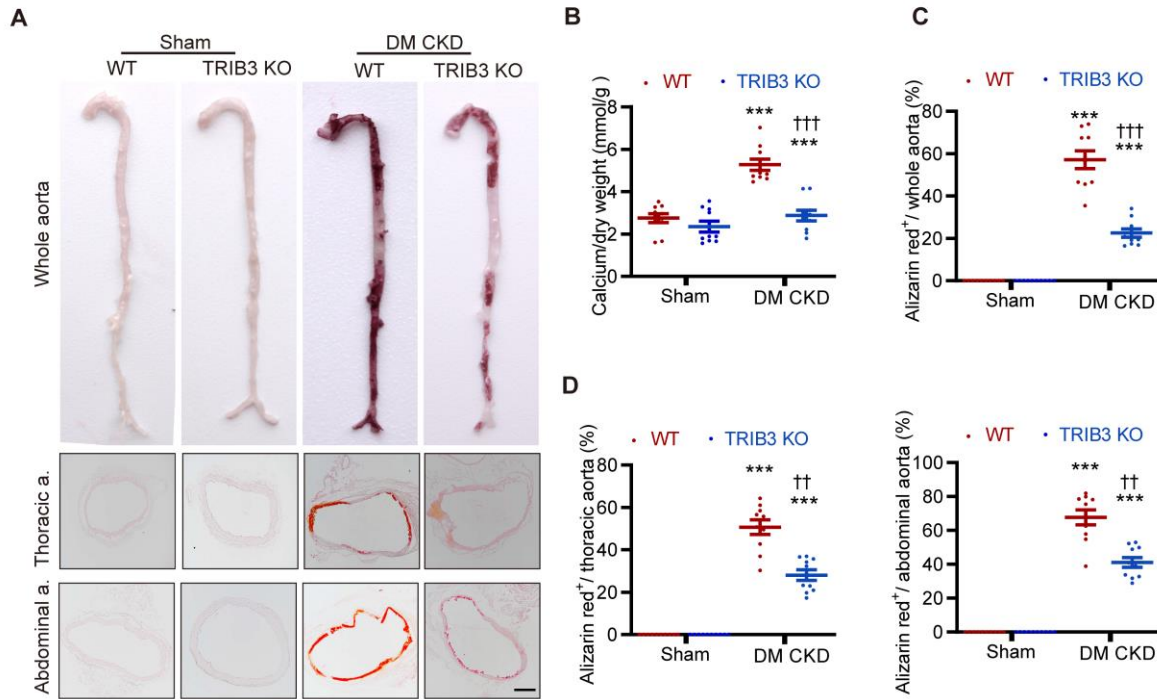

### Supplementary Figure 8. Impact of TRIB3 deficiency in diabetic mice

**A**, Representative Alizarin red staining of whole aorta and thoracic and abdominal aorta section images showing aortic alizarin red staining in the indicated group of mice. Scale bar: 50 $\mu$ m. Calcified areas are shown as red staining. **B**, Calcium content analysis in the aortic arch of indicated group of mice, normalized by dry weight. Statistical analyses were performed using the 2-way ANOVA. **C-D**, The ratio of Alizarin Red-positive area to the whole aortic area, thoracic aorta, and abdominal aorta in the indicated group of mice. Statistical analyses were performed using the 2-way ANOVA. \*\*\* $P < 0.001$  statistically significant vs. Sham CTR mice; †† $P < 0.01$ , ††† $P < 0.001$  statistically significant vs. CKD CTR mice.  $n=10$  per group unless otherwise indicated. Scatter dot plots and arithmetic means  $\pm$  SEM (AU).



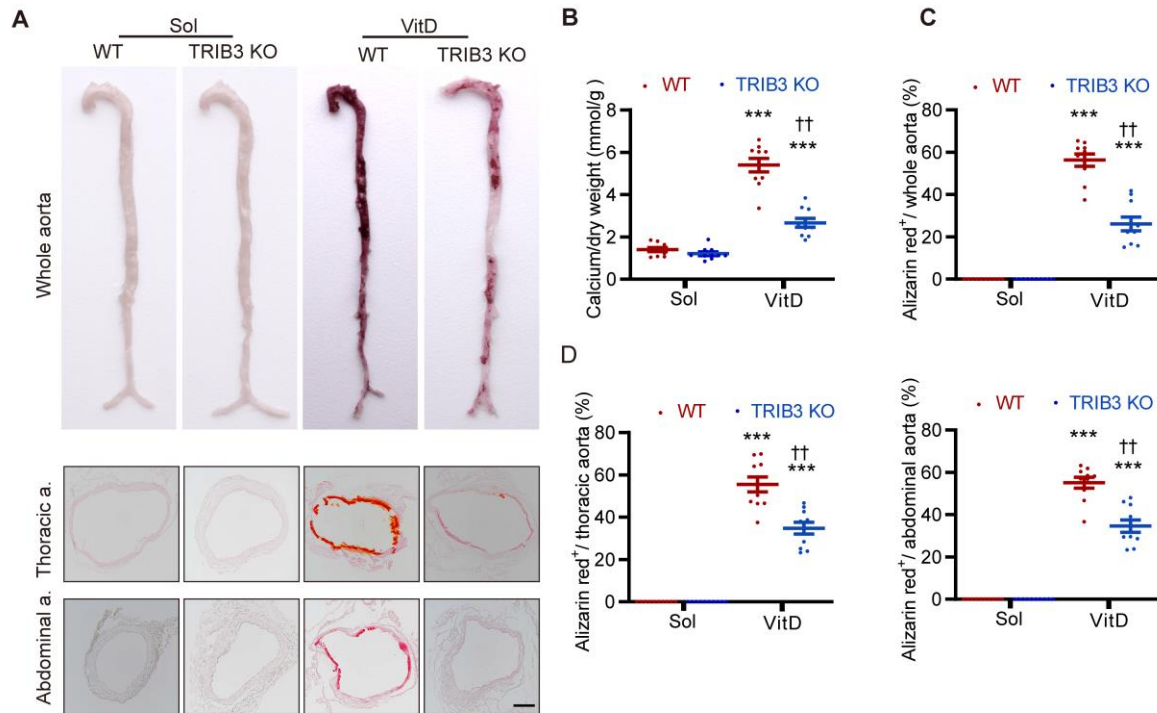

### Supplementary Figure 9. Impact of TRIB3 deficiency in VitD mice

**A**, Representative Alizarin red staining of whole aorta and thoracic and abdominal aorta section images showing aortic alizarin red staining in the indicated group of mice. Scale bar: 50μm. Calcified areas are shown as red staining. **B**, Calcium content analysis in the aortic arch of indicated group of mice, normalized by dry weight. Statistical analyses were performed using the 2-way ANOVA. **C-D**, The ratio of Alizarin red-positive area to the whole aortic area, thoracic aorta, and abdominal aorta in the indicated group of mice. Statistical analyses were performed using the 2-way ANOVA. \*\*\* $P < 0.001$  statistically significant vs. Sol WT mice; †† $P < 0.01$  statistically significant vs. VitD WT mice. n=10 per group unless otherwise indicated. Scatter dot plots and arithmetic means  $\pm$  SEM (AU). Sol, Solvent. VitD, vitamin D<sub>3</sub>.



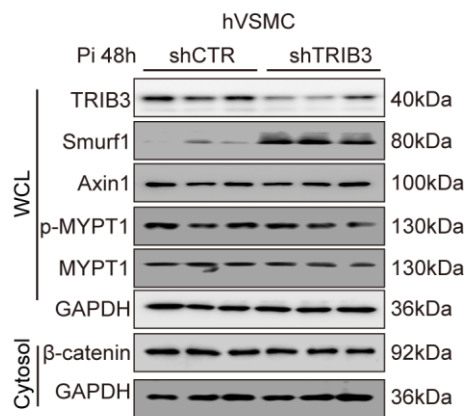

### Supplementary Figure 10. Western Blot Analysis of Wnt pathway in Pi-treated hVSMCs

Representative western blots showing the expression of the indicated Wnt pathway proteins in hVSMC treated with Pi (2.6 mM, 48h). The presented results represent one of three independent replicates.

### UUO

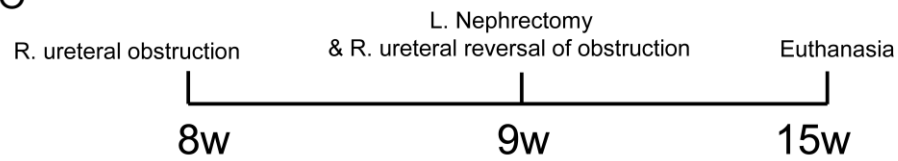

### 5/6 Nephrectomy

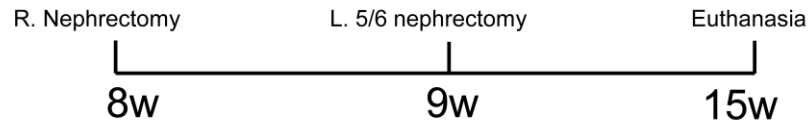

### CKD after AKI

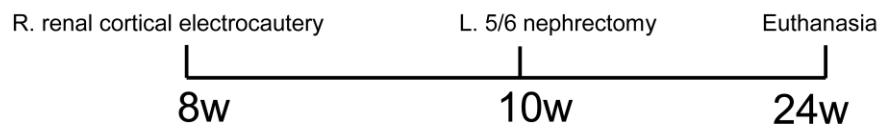

### Metabolic CKD

(Hyperlipidemic diabetes mellitus in ApoE KO mice)

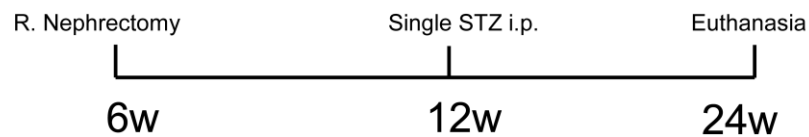

### DM CKD

(Diabetes mellitus in C57BL/6J background mice)

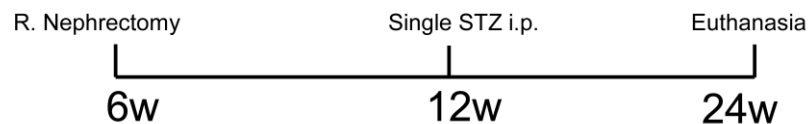

### Supplementary Figure 11. Animal experiment flow chart

Right (R.), Left (L.), 5/6 nephrectomy (Nx) mice, unilateral ureteral obstruction (UUO) mice, chronic renal disease (CKD), streptozotocin (STZ), intraperitoneal injection (i.p.).
